# Supplementary material
Source: publisher site journal article supplement (https://www.dovepress.com/article/557297)
Supplement: Supplementary file 1 [file 557297%20Revised%20Supplementary_.docx]

Supplementary Material

Nucleotide MALDI-TOF-MS assay

1.PCR reaction

For the extraction of DNA, 2-3 mL of bronchoalveolar lavage fluid (BALF) or sputum was suspended in 400 µL of TE buffer (pH 8.0; consisting of 10 mM Tris-HCl and 1 mM ethylenediaminetetraacetic acid). This suspension was subsequently inactivated by heating at 95°C for 10 minutes. Following inactivation, the mixture was incubated at 85°C for 30 minutes and then centrifuged at 12,000 g for 5 minutes. The supernatant, which contains the DNA, was collected and stored at −20°C for subsequent analysis.

2.PCR reaction

For the polymerase chain reaction (PCR), the reaction mixture comprised 1.3 μL of deionized water, 0.5 μL of 10×PCR buffer with 20 mM MgCl2, 0.4 μL of 20 mM MgCl2, 0.1 μL of a 25 mM deoxynucleotide triphosphate mix, 0.5 μL of a 1 μM primer mix, 0.2 μL of a 5 U/μL PCR enzyme, and 2.0 μL of a 5 ng/μL DNA template. The PCR protocol included an initial denaturation step at 95°C for 2 minutes, followed by 30 cycles of denaturation at 95°C for 30 seconds, annealing at 56°C for 30 seconds, and extension at 72°C for 60 seconds, with a final extension step at 72°C for 5 minutes. Each run included a blank control (2 µL of deionized water), a negative control (2 µL of TE buffer), and a positive control to ensure the accuracy and reliability of the results.

3.Shrimp Alkaline Phosphatase (SAP) reaction

The SAP mixture was prepared to a final volume of 2 μL, comprising 1.53 μL of deionized water, 0.17 μL of SAP buffer, and 0.30 μL of SAP enzyme. This mixture was subsequently added to the PCR product and incubated for 40 minutes at 37°C, followed by an inactivation step at 85°C for 5 minutes.

4.Extension reaction

A 2.0 μL iPLEX extension reaction was then prepared, consisting of 0.62 μL of deionized water, 0.20 μL of iPLEX buffer, 0.20 μL of iPLEX termination mix, 0.94 μL of Extend primer mix, and 0.04 μL of iPLEX enzyme, and added to each well. The extension reaction was conducted with the following thermal cycling conditions: initial denaturation at 94°C for 30 seconds, followed by 40 cycles of 94°C for 5 seconds, five rounds of annealing at 52°C for 5 seconds, and extension at 80°C for 5 seconds, concluding with a final extension at 72°C for 3 minutes.

5.Sample desalting

Approximately 15 mg of clean resin were introduced into each reaction well along with 41 μL of water, sealed with sealing films, and subjected to vortexing or rotation for 15 minutes to ensure thorough mixing of the resin with the reaction mixture. The plate was then centrifuged at 3200 g for 5 minutes.

6.Mass spectrometry analysis

the PCR products were dispensed onto the chip using the MassARRAY® Nanodispenser, and the chip was placed into the MassARRAY® Analyzer for detection and analysis.
